# Supplementary material for: Multiple exposures, reinfection and risk of progression to active tuberculosis
Source: R Soc Open Sci. 2019 Mar 20;6(3):180999. doi: 10.1098/rsos.180999 (PMC6458392; doi:10.1098/rsos.180999)
Supplement: Data [file rsos180999supp3.csv]

case	num_total_exposures
1	20
0	16
0	4
0	4
0	17
0	7
0	2
0	3
1	5
0	2
0	14
0	3
0	1
1	1
1	4
0	2
1	7
0	1
0	8
0	1
0	3
0	12
0	16
0	1
0	27
0	1
0	1
1	1
0	1
0	2
0	1
0	17
1	1
1	17
1	13
0	8
0	23
0	1
0	1
0	6
1	28
0	1
0	1
1	23
0	2
0	4
1	24
0	12
0	3
0	12
1	20
0	7
0	1
1	23
1	4
1	3
0	1
1	25
0	6
1	1
0	13
0	25
1	2
0	3
1	2
0	16
1	2
0	5
0	3
0	2
0	1
0	2
0	1
0	7
1	15
0	2
0	4
0	4
1	3
0	24
0	2
0	15
1	4
0	1
0	11
0	1
0	6
1	23
0	3
0	1
0	6
0	24
0	2
1	27
0	2
0	3
0	1
0	17
1	25
0	2
0	14
0	1
0	20
0	1
0	14
0	3
0	13
1	26
0	3
0	13
0	12
0	2
0	2
0	3
0	15
0	19
0	2
0	1
0	2
1	24
0	2
0	7
0	5
0	5
0	4
1	16
0	5
0	1
0	23
0	2
0	26
0	25
0	2
0	2
0	15
0	7
0	2
0	1
1	14
0	9
0	1
1	3
0	1
0	2
1	21
1	24
0	4
0	1
0	8
